# Supplementary material for: Distinctive dust weather intensities in North China resulted from two types of atmospheric circulation anomalies
Source: Copernicus journal article supplement (doi:10.5194/egusphere-2024-1923), 2024-07-16
Supplement: Supplementary file 1 [file egusphere-2024-1923-supplement.pdf]

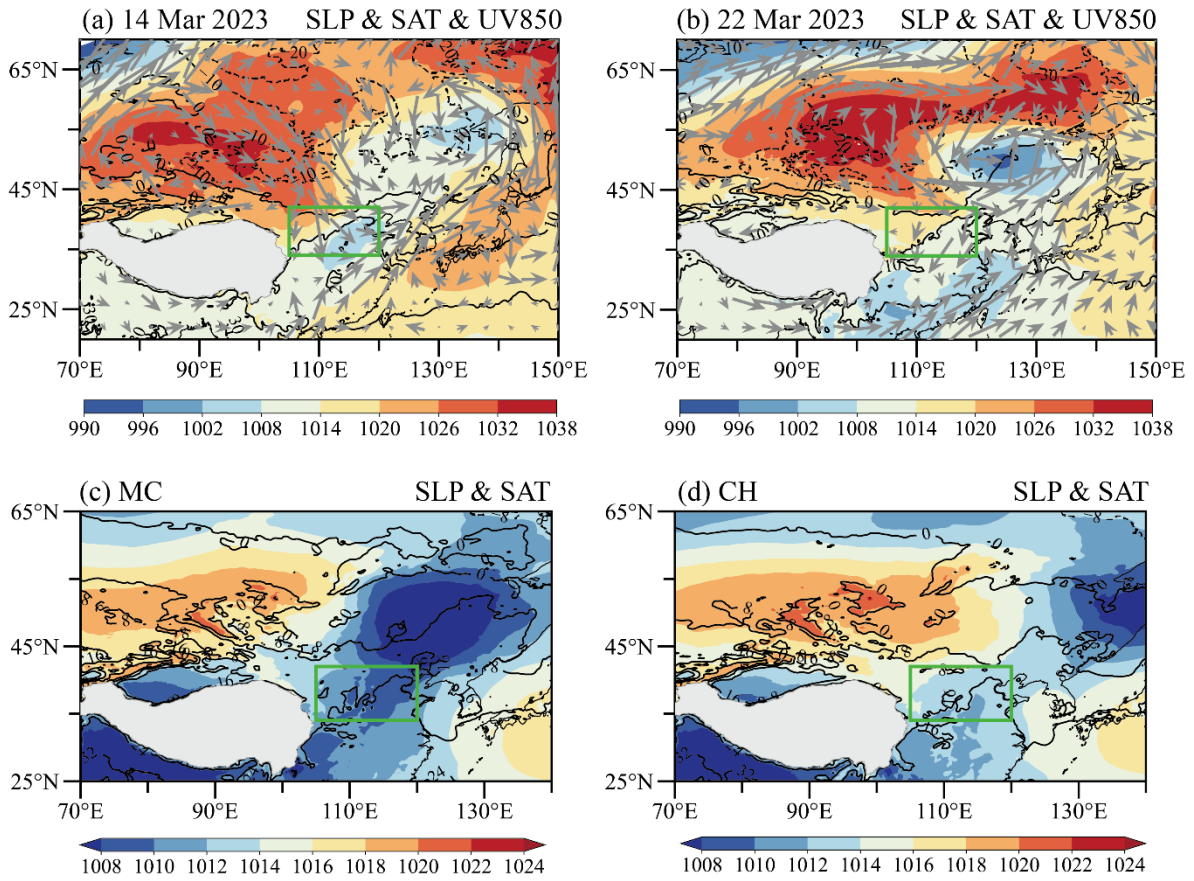

1

2 **Figure S1.** (a) SLP (shading, units: hPa), SAT (contour, units: °C) and UV850 (vectors, units:  
 3 m s<sup>-1</sup>) on 14 March 2023. Panel (b) is the same as (a) but for 22 March 2023. (c) Composite  
 4 SLP (shading, units: hPa) and SAT (contour, units: °C) during MC days. Panel (d) is the same  
 5 as (c) but for CH days. The green boxes in panel (a)–(d) represent NC.

6

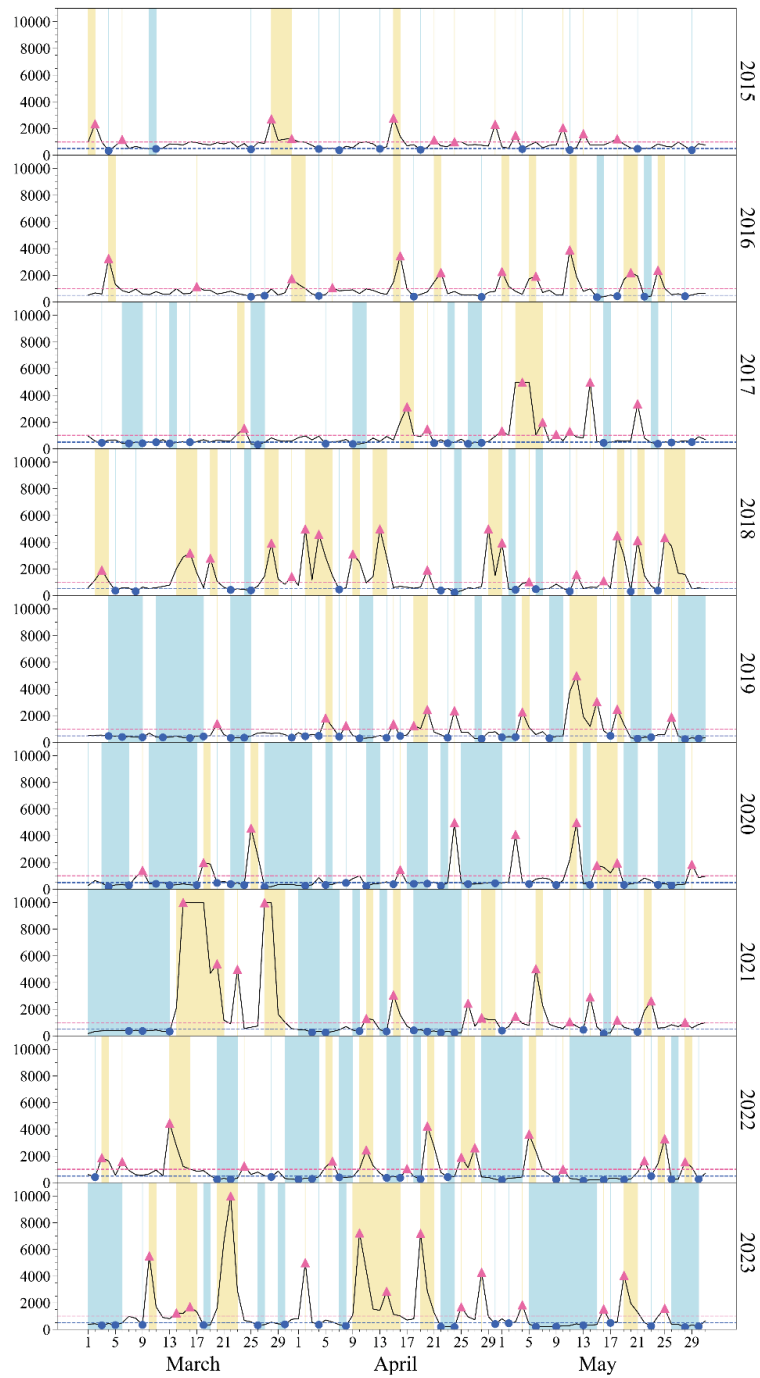

7

8 **Figure S2.** Variations of observed daily maximum PM<sub>10</sub> concentrations (black lines, unit:  $\mu\text{g}$   
 9  $\text{m}^{-3}$ ) over NC in spring from 2015 to 2023. The yellow shadings represent periods of PM<sub>10</sub>  
 10 concentrations exceeding  $1000 \mu\text{g m}^{-3}$ , while the blue shadings represent periods with PM<sub>10</sub>  
 11 concentrations below  $500 \mu\text{g m}^{-3}$ . The pink triangles represent the maximum PM<sub>10</sub>  
 12 concentrations exceeding  $1000 \mu\text{g m}^{-3}$ , while the blue dots represent the minimum PM<sub>10</sub>  
 13 concentrations below  $500 \mu\text{g m}^{-3}$ . Dashed lines (blue and pink) depict threshold values for PM<sub>10</sub>  
 14 concentration at  $500$  and  $1000 \mu\text{g m}^{-3}$  respectively.

15

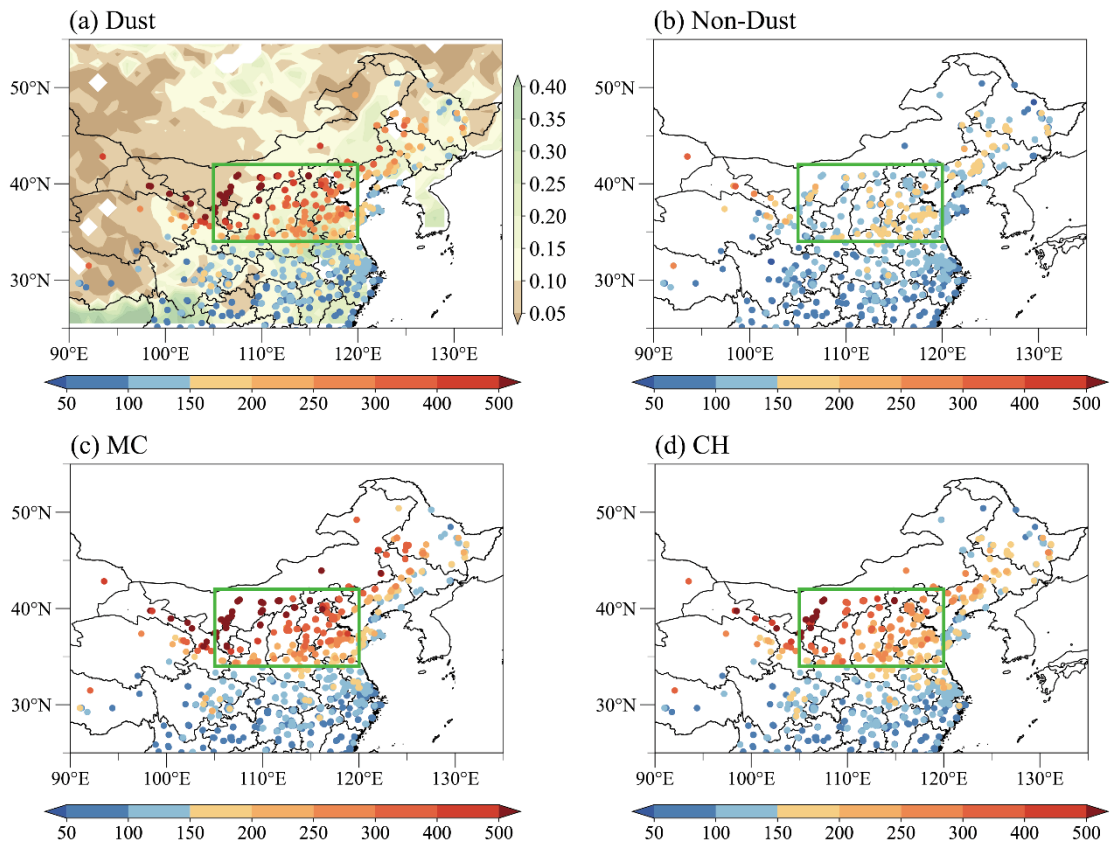

16

17 **Figure S3.** (a) Composite distribution of observed daily maximum  $\text{PM}_{10}$  concentrations (scatter,  
 18 unit:  $\mu\text{g m}^{-3}$ ) during Dust days. Panel (b), (c) and (d) are the same as (a) but for Non-Dust days,  
 19 MC days and CH days. The shading in panel (a) indicates NDVI in March 2023. The green  
 20 boxes in panel (a)–(d) represent NC.

21

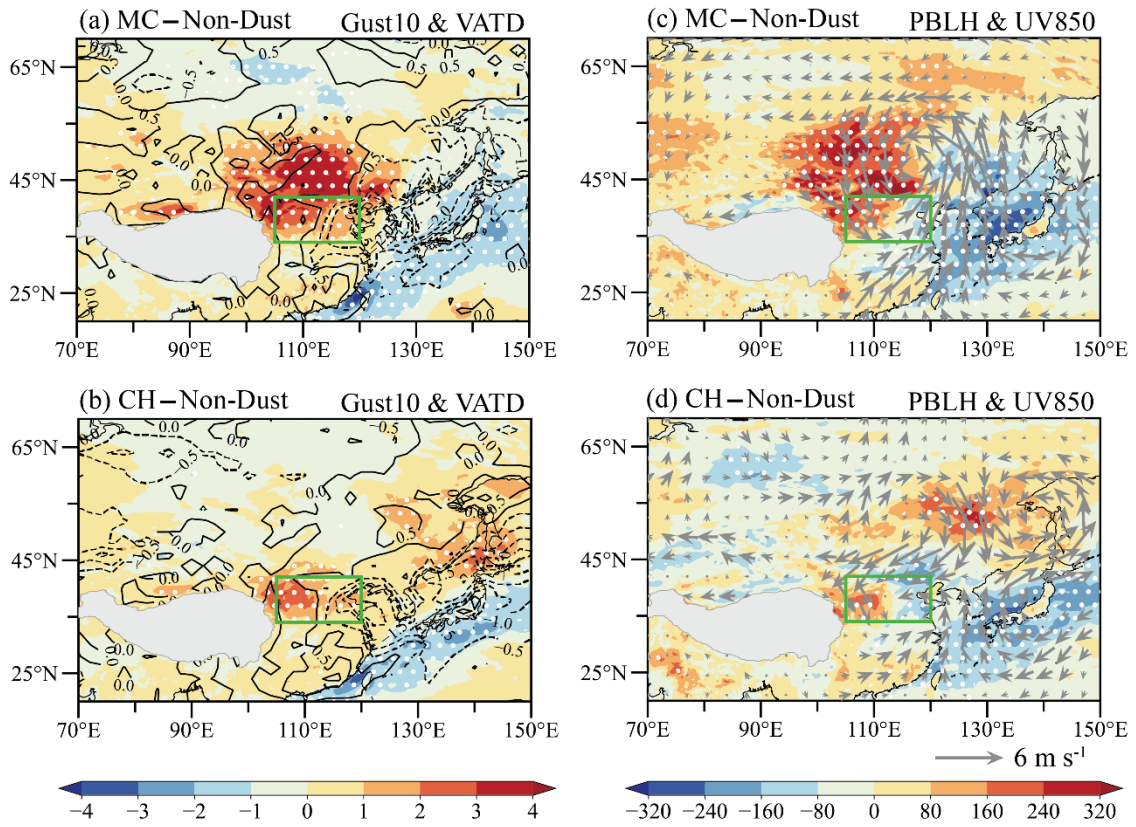

22

23 **Figure S4.** (a) Composite differences of Gust10 (shading, units:  $\text{m s}^{-1}$ ) and VATD (contour,  
 24 units: K) during MC days relative to Non-Dust days. White dots indicate that the differences of  
 25 Gust10 exceed the 95% confidence level. Panel (b) is the same as panel (a) but for CH days. (c)  
 26 Composite differences of PBLH (shading, units: m) during MC days relative to Non-Dust days  
 27 and composite anomalies of UV850 (vectors, units:  $\text{m s}^{-1}$ ). White dots indicate that the  
 28 differences of PBLH exceed the 95% confidence level. Panel (d) is the same as panel (c) but  
 29 for CH days. The green boxes in panel (a)–(d) represent NC.

30

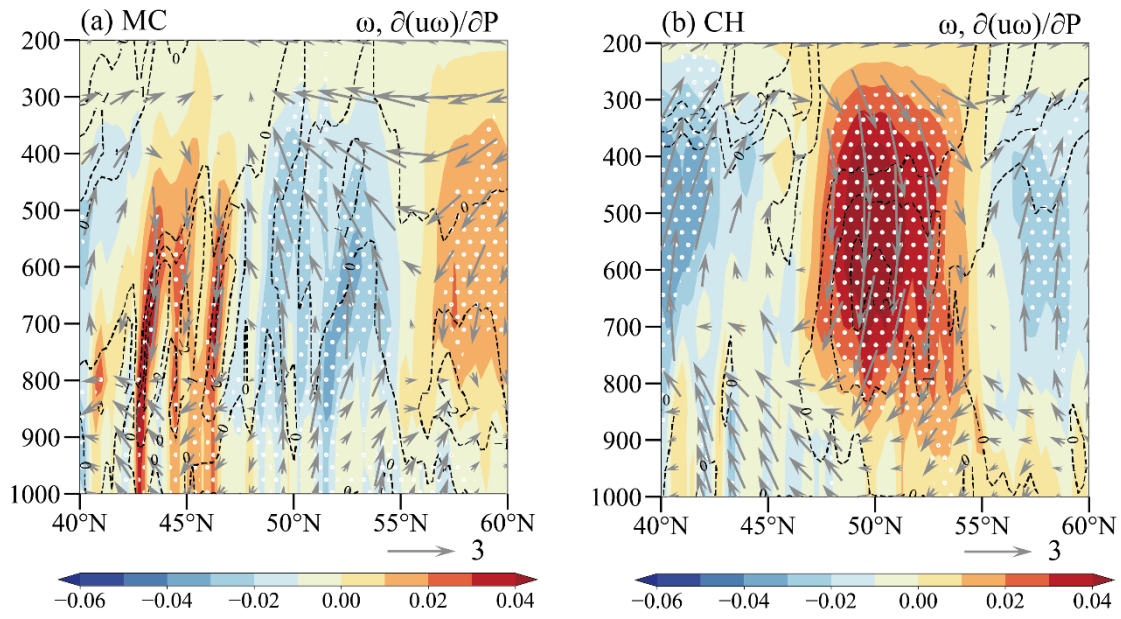

31

32 **Figure S5.** (a) Composite anomalies of meridional component of the vertical circulation  
 33 average over 40–60° N, 90–120° E during MC days. The variables include  $\omega$  (shading, units:  
 34 Pa s<sup>-1</sup>) and downward transport of westerly momentum ( $<0$ , dashed contour, units: 10<sup>-3</sup> m s<sup>-2</sup>).  
 35 White dots indicate that  $\omega$  anomalies exceed the 95% confidence level. The vectors represent  
 36  $\omega$  (magnified 100 times) and zonal wind. Panel (b) is the same as (a) but for CH days.

37

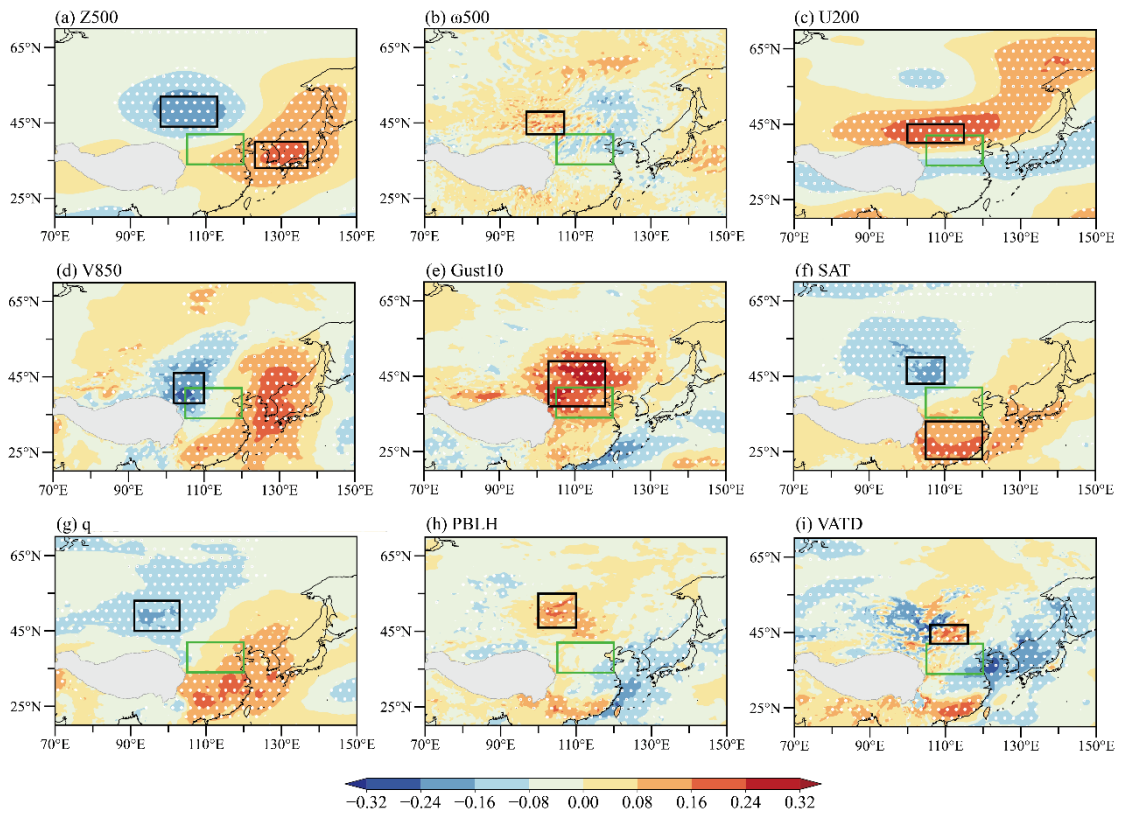

38

39 **Figure S6.** Correlation coefficients of observed daily maximum  $PM_{10}$  concentrations over NC  
 40 with daily mean (a) Z500, (b)  $\omega_{500}$ , (c) U200, (d) V850, (e) Gust10, (f) SAT, (g) q, (h) PBLH,  
 41 and (i) VATD in spring from 2015 to 2023. White dots indicate that correlation coefficients  
 42 exceed the 95% confidence level. The green boxes in panel (a)–(i) represent NC. The black  
 43 boxes in panel (a)–(i) represent the regions for calculating the indices respectively (Table 1).

44
